# Supplementary material for: VenoMS—A Website for the Low Molecular Mass Compounds in Spider Venoms
Source: MDPI journal article supplement (doi:10.3390/metabo10080327), 2020-08-11
Supplement: s1 [file s1]

Supplementary material for:

## ***venoMS* – A Database for the Low Molecular Mass Compounds in Spider Venoms**

**Yvonne M. Forster <sup>1</sup>, Silvan Reusser <sup>2</sup>, Florian Forster <sup>2</sup>, Stefan Bienz <sup>1</sup> and Laurent Bigler <sup>1,\*</sup>**

<sup>1</sup> University of Zurich, Department of Chemistry, Winterthurerstrasse 190, 8057 Zurich, Switzerland

<sup>2</sup> CAOS AG, Teufener Strasse 19, 9000 St. Gallen, Switzerland

\* Correspondence: laurent.bigler@chem.uzh.ch; Tel.: +41-44-635-68-12

*Supplementary Figure 1:* UHPLC-HR-ESI-MS(/MS) data acquired with the SAM2020 method and used for the characterization of IndAc4333 from the venom of *A. aperta*, and the comparison of this data with the values generated by FRIOC (full scan values before and after H/D exchange and MS/MS fragment ion masses).

*Supplementary Figure 2:* UHPLC-HR-ESI-MS(/MS) data acquired with the SAM2020 method and used for the characterization of 4-OH-IndAc3(OH)335(NMe<sub>3</sub>)<sup>+</sup> from the venom of *A. aperta*, and the comparison of this data with the values generated by FRIOC (full scan values before and after H/D exchange and MS/MS fragment ion masses).

*Supplementary Figure 3:* UHPLC-HR-ESI-MS(/MS) data acquired with the SAM2020 method and used for the characterization of 4-OH-IndAc3(OH)335(NMe<sub>2</sub>) from the venom of *A. aperta*, and the comparison of this data with the values generated by FRIOC (full scan values before and after H/D exchange and MS/MS fragment ion masses).

## Supplementary Figure 1: IndAc4333 (*Agelenopsis aperta*)

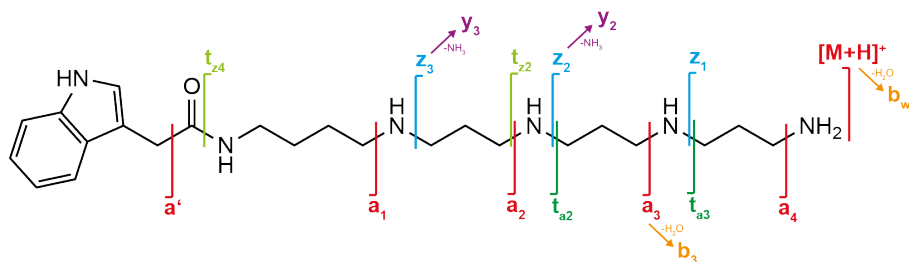

RT: 0.00 - 22.01

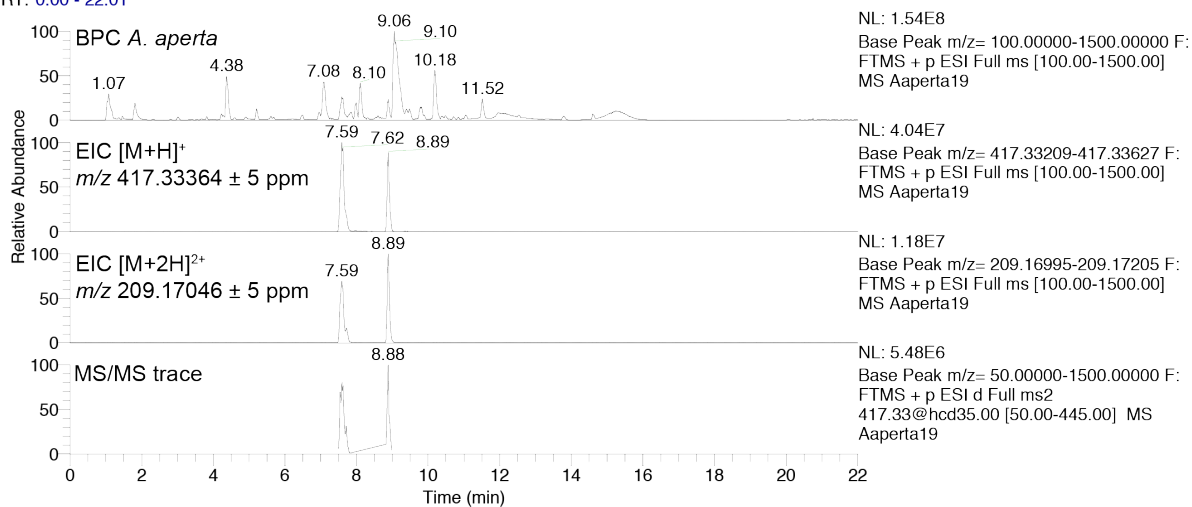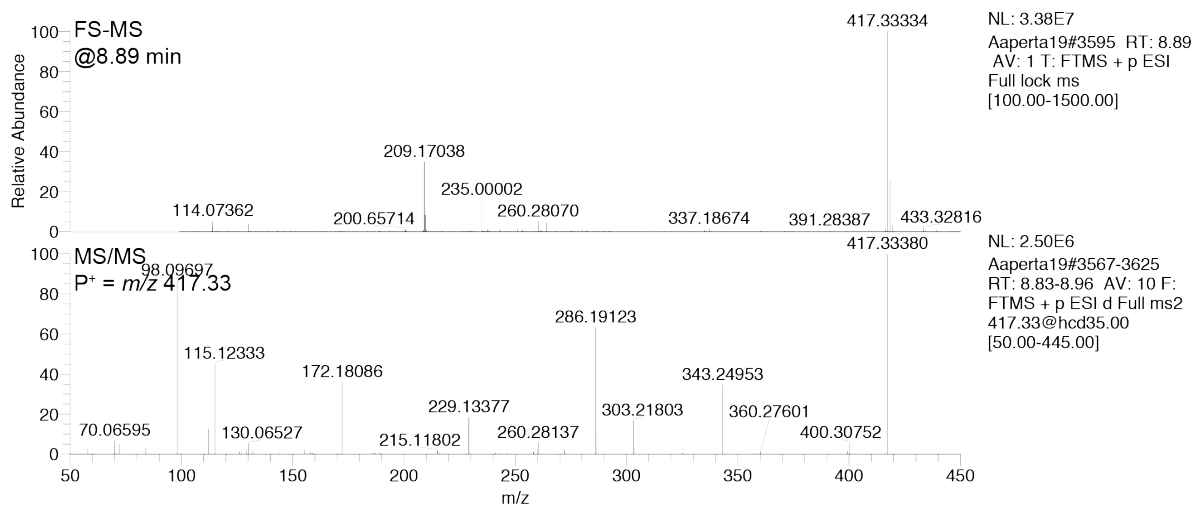

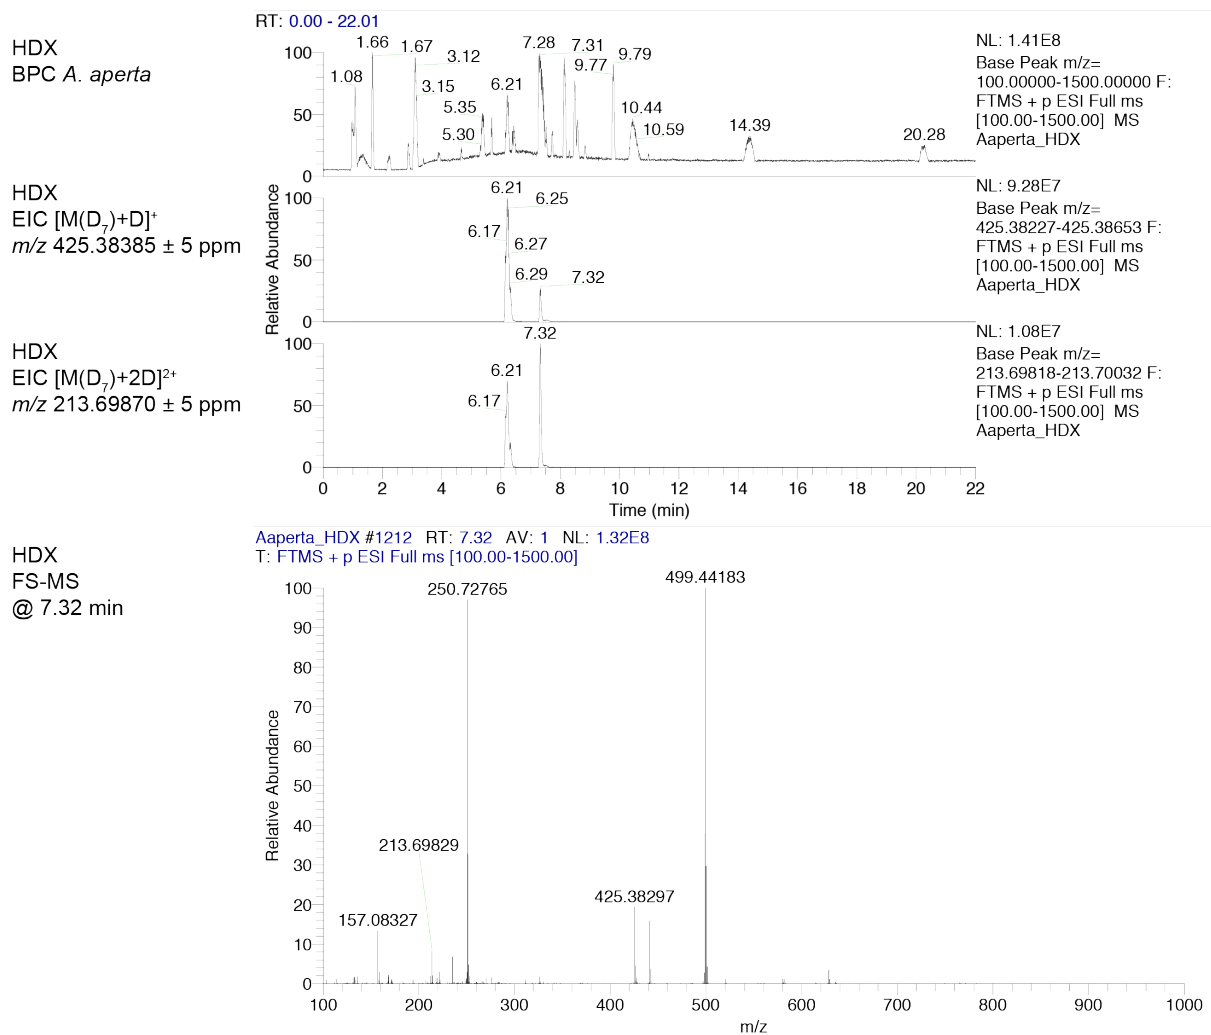

## FS-MS / FS-MS HDX

|                                     | <i>m/z</i> detected | <i>R</i> <sub>t</sub> [min] | <i>m/z</i> FRIOC | Molecular formula                                                            | Δ [ppm] |
|-------------------------------------|---------------------|-----------------------------|------------------|------------------------------------------------------------------------------|---------|
| [M+H] <sup>+</sup>                  | 417.33334           | 8.89                        | 417.33364        | C <sub>23</sub> H <sub>41</sub> N <sub>6</sub> O <sup>+</sup>                | -0.72   |
| [M(D <sub>7</sub> )+D] <sup>+</sup> | 425.38297           | 7.32                        | 425.38385        | C <sub>23</sub> H <sub>33</sub> D <sub>8</sub> N <sub>6</sub> O <sup>+</sup> | -2.07   |

**MS/MS fragment ions (P<sup>+</sup> = *m/z* 417.33)**

| <i>m/z</i> detected | Rel. Int. | <i>m/z</i> FRIOC | Molecular formula                                             | $\Delta$ [ppm] | Fragment type      |
|---------------------|-----------|------------------|---------------------------------------------------------------|----------------|--------------------|
| 58.06602            | 2.82      | 58.06513         | C <sub>3</sub> H <sub>8</sub> N <sup>+</sup>                  | 15.33          | z <sub>1</sub>     |
| 70.06595            | 6.68      | –                |                                                               |                |                    |
| 72.08155            | 5.08      | –                |                                                               |                |                    |
| 84.08158            | 3.45      | –                |                                                               |                |                    |
| 98.09697            | 86.36     | 98.09643         | C <sub>6</sub> H <sub>12</sub> N <sup>+</sup>                 | 5.50           | y <sub>2</sub>     |
| 112.11246           | 12.67     | –                | C <sub>7</sub> H <sub>14</sub> N <sup>+</sup>                 | 3.39           | y <sub>2</sub> ' * |
| 115.12333           | 45.27     | 115.12297        | C <sub>6</sub> H <sub>15</sub> N <sub>2</sub> <sup>+</sup>    | 3.13           | z <sub>2</sub>     |
| 126.12816           | 1.44      | –                |                                                               |                |                    |
| 129.13899           | 1.93      | –                | C <sub>7</sub> H <sub>17</sub> N <sub>2</sub> <sup>+</sup>    | 2.79           | z <sub>2</sub> ' * |
| 130.06528           | 5.26      | –                | C <sub>9</sub> H <sub>8</sub> N <sup>+</sup>                  | 1.15           | a' *               |
| 132.14979           | 1.80      | 132.14952        | C <sub>6</sub> H <sub>18</sub> N <sub>3</sub> <sup>+</sup>    | 2.04           | tz <sub>2</sub>    |
| 155.15458           | 2.25      | 155.15428        | C <sub>9</sub> H <sub>19</sub> N <sub>2</sub> <sup>+</sup>    | 1.93           | y <sub>3</sub>     |
| 158.06061           | 0.61      | –                | C <sub>10</sub> H <sub>8</sub> NO <sup>+</sup>                | 3.61           | a <sub>0</sub> *   |
| 159.09208           | 0.50      | –                |                                                               |                |                    |
| 172.18086           | 36.00     | 172.18082        | C <sub>9</sub> H <sub>22</sub> N <sub>3</sub> <sup>+</sup>    | 0.23           | z <sub>3</sub>     |
| 186.19689           | 0.64      | –                |                                                               |                |                    |
| 215.11799           | 1.66      | –                |                                                               |                |                    |
| 229.13377           | 18.62     | 229.13354        | C <sub>14</sub> H <sub>17</sub> N <sub>2</sub> O <sup>+</sup> | 1.00           | a <sub>1</sub>     |
| 258.16048           | 1.06      | –                |                                                               |                |                    |
| 260.28134           | 5.73      | 260.28087        | C <sub>13</sub> H <sub>34</sub> N <sub>5</sub> <sup>+</sup>   | 1.81           | tz <sub>4</sub>    |
| 272.17614           | 2.02      | –                |                                                               |                |                    |
| 286.19123           | 64.04     | 286.19139        | C <sub>17</sub> H <sub>24</sub> N <sub>3</sub> O <sup>+</sup> | -0.56          | a <sub>2</sub>     |
| 303.21803           | 16.76     | 303.21793        | C <sub>17</sub> H <sub>27</sub> N <sub>4</sub> O <sup>+</sup> | 0.33           | ta <sub>2</sub>    |
| 325.23977           | 0.68      | 325.23867        | C <sub>20</sub> H <sub>29</sub> N <sub>4</sub> <sup>+</sup>   | 3.38           | b <sub>3</sub>     |
| 343.24953           | 34.97     | 343.24924        | C <sub>20</sub> H <sub>31</sub> N <sub>4</sub> O <sup>+</sup> | 0.84           | a <sub>3</sub>     |
| 360.27607           | 1.54      | 360.27579        | C <sub>20</sub> H <sub>34</sub> N <sub>5</sub> O <sup>+</sup> | 0.78           | ta <sub>3</sub>    |
| 399.32389           | 1.61      | –                |                                                               |                |                    |
| 400.30750           | 5.57      | 400.30709        | C <sub>23</sub> H <sub>38</sub> N <sub>5</sub> O <sup>+</sup> | 1.02           | a <sub>4</sub>     |
| 417.33380           | 100.00    | 417.33364        | C <sub>23</sub> H <sub>41</sub> N <sub>6</sub> O <sup>+</sup> | 0.38           | [M+H] <sup>+</sup> |

\* this fragment ion is not generated by FRIOC

Supplementary Figure 2: 4-OH-IndAc3(OH)335(NMe<sub>3</sub>)<sup>+</sup> (*Agelenopsis aperta*)

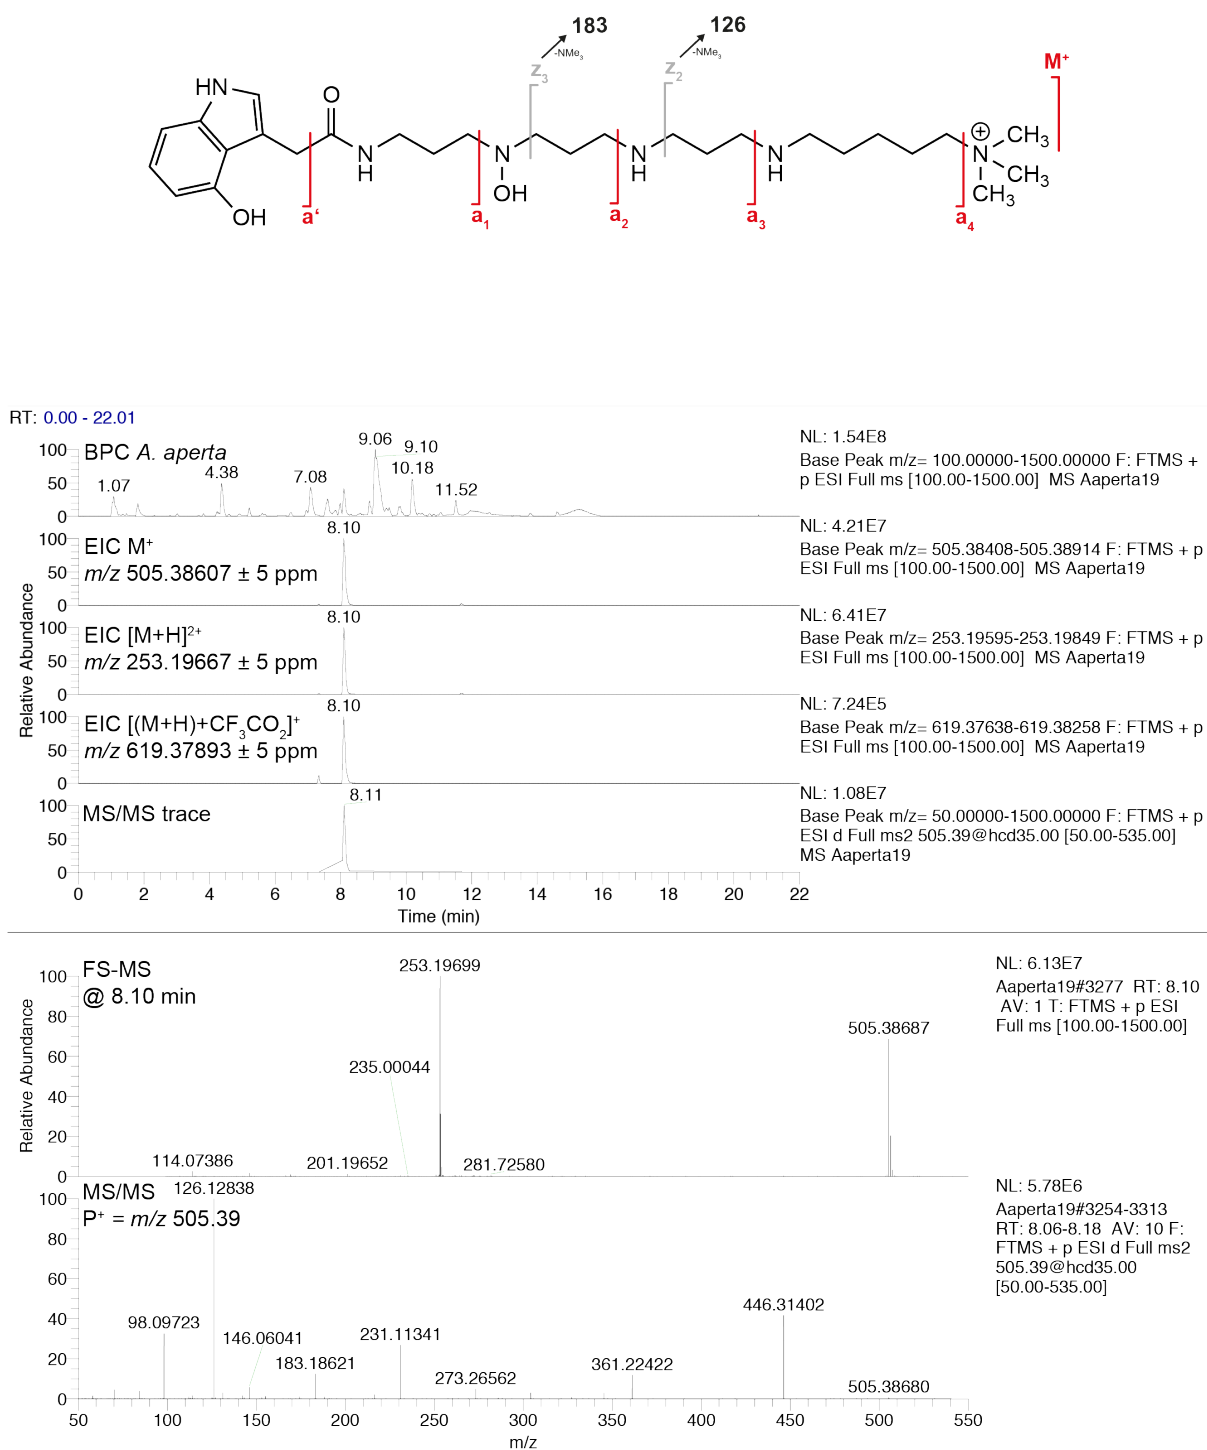

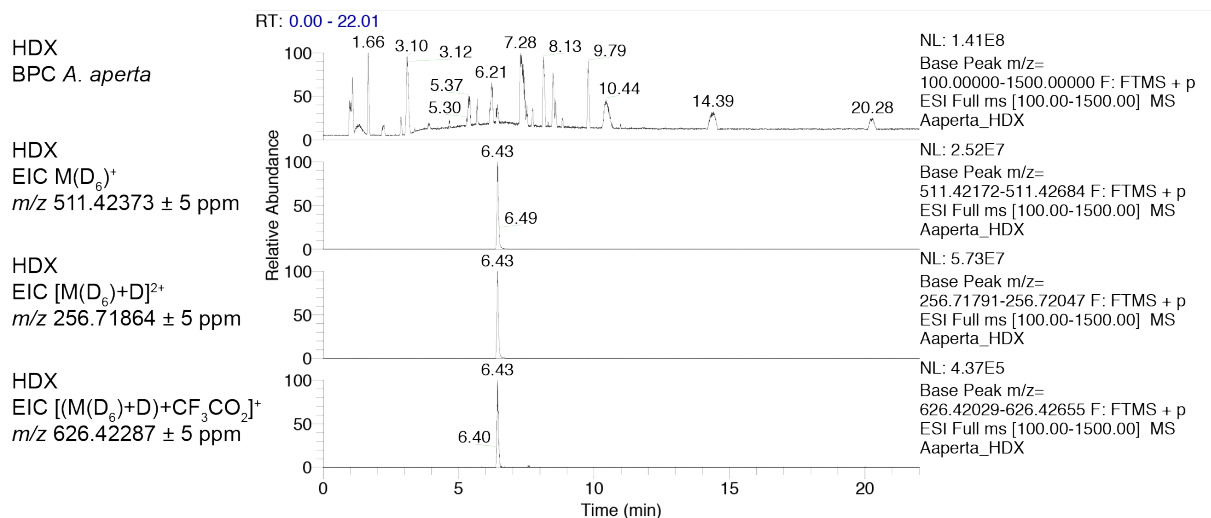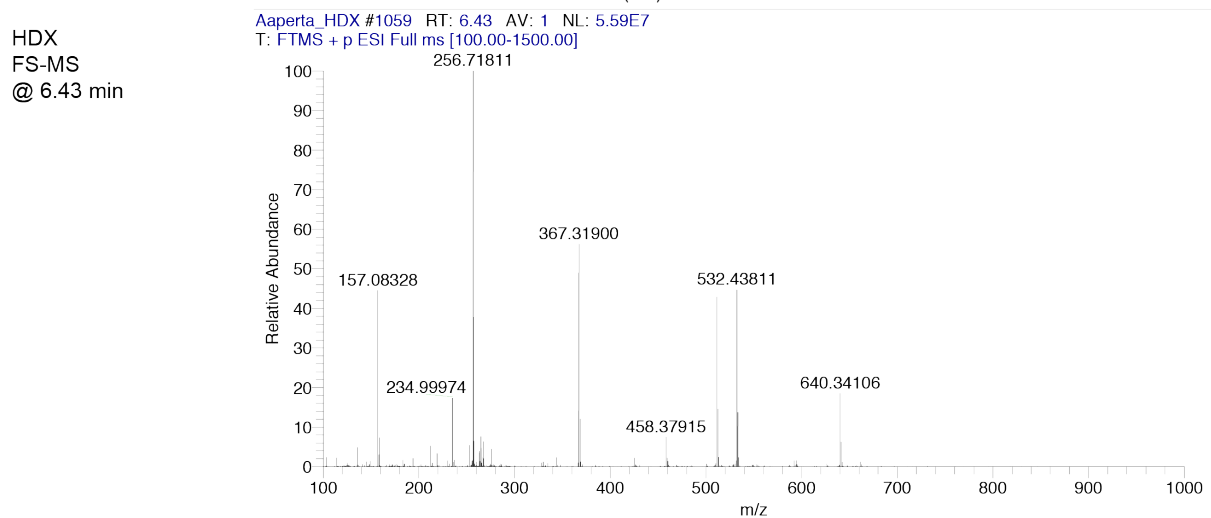

## FS-MS / FS-MS HDX

|            | $m/z$ detected | $R_t$ [min] | $m/z$ FRIOC | Molecular formula         | $\Delta$ [ppm] |
|------------|----------------|-------------|-------------|---------------------------|----------------|
| $M^+$      | 505.38687      | 8.10        | 505.38607   | $C_{27}H_{49}N_6O_3^+$    | 1.58           |
| $M(D_6)^+$ | 511.42300      | 6.43        | 511.42373   | $C_{27}H_{43}D_6N_6O_3^+$ | -1.43          |

**MS/MS ( $P^+ = m/z$  505.39)**

| $m/z$ detected | Rel. Int. | $m/z$ FRIOC | Molecular formula      | $\Delta$ [ppm] | Fragment type      |
|----------------|-----------|-------------|------------------------|----------------|--------------------|
| 58.06612       | 1.51      | –           |                        |                |                    |
| 70.06610       | 4.55      | –           |                        |                |                    |
| 84.08169       | 3.83      | –           |                        |                |                    |
| 98.09723       | 32.66     | –           | $C_6H_{12}N^+$         | 8.16           | $y_2'^*$           |
| 112.11267      | 1.12      | –           |                        |                |                    |
| 114.09202      | 1.64      | –           |                        |                |                    |
| 125.12059      | 0.63      | –           |                        |                |                    |
| 126.12838      | 100.00    | –           | $C_8H_{16}N^+$         | 5.15           | $z_2 - NMe_3^*$    |
| 127.12353      | 0.61      | –           |                        |                |                    |
| 131.11855      | 3.05      | –           |                        |                |                    |
| 142.12307      | 1.60      | –           |                        |                |                    |
| 143.15498      | 0.78      | –           |                        |                |                    |
| 146.06041      | 5.73      | –           | $C_9H_8NO^+$           | 2.53           | $a'^*$             |
| 153.13895      | 0.84      | –           |                        |                |                    |
| 155.15491      | 1.19      | –           |                        |                |                    |
| 174.05582      | 1.03      | –           | $C_{10}H_8NO_2^+$      | 5.00           | $a_0^*$            |
| 183.18621      | 12.33     | –           | $C_{11}H_{23}N_2^+$    | 3.44           | $z_3 - NMe_3^*$    |
| 188.17666      | 0.98      | –           |                        |                |                    |
| 216.20792      | 2.06      | –           | $C_{11}H_{26}N_3O^+$   | 4.02           | $t_{z3} - NMe_3^*$ |
| 231.11341      | 27.40     | 231.11280   | $C_{13}H_{15}N_2O_2^+$ | 2.64           | $a_1$              |
| 273.26562      | 4.86      | –           | $C_{14}H_{33}N_4O^+$   | 2.67           | $t_{z4} - NMe_3^*$ |
| 304.16639      | 3.14      | 304.16557   | $C_{16}H_{22}N_3O_3^+$ | 2.70           | $a_2$              |
| 327.21856      | 0.82      | –           |                        |                |                    |
| 345.22911      | 2.85      | –           |                        |                |                    |
| 361.22422      | 11.79     | 361.22342   | $C_{19}H_{29}N_4O_3^+$ | 2.21           | $a_3$              |
| 446.31402      | 42.64     | 446.31257   | $C_{24}H_{40}N_5O_3^+$ | 3.25           | $a_4$              |
| 505.38680      | 0.58      | 505.38606   | $C_{27}H_{49}N_6O_3^+$ | 1.44           | $M^+$              |

\* this fragment ion is not generated by FRIOC

Supplementary Figure 3: 4-OH-IndAc3(OH)335(NMe<sub>2</sub>) (*Agelenopsis aperta*)

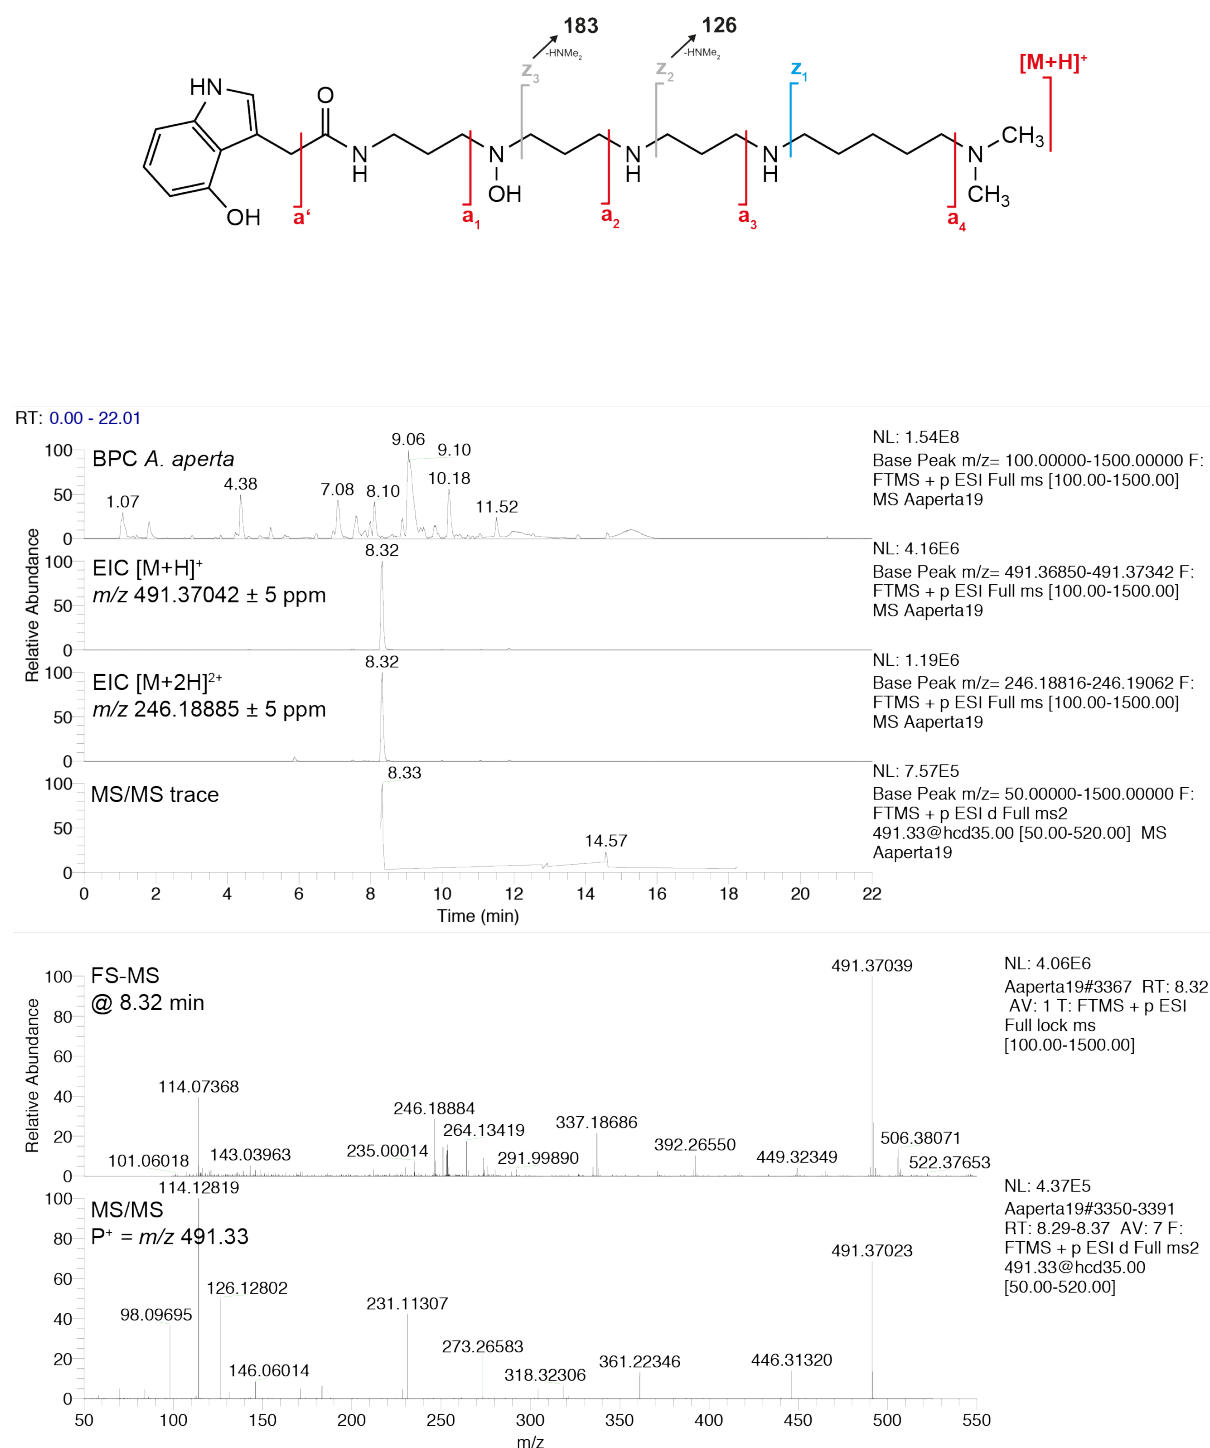



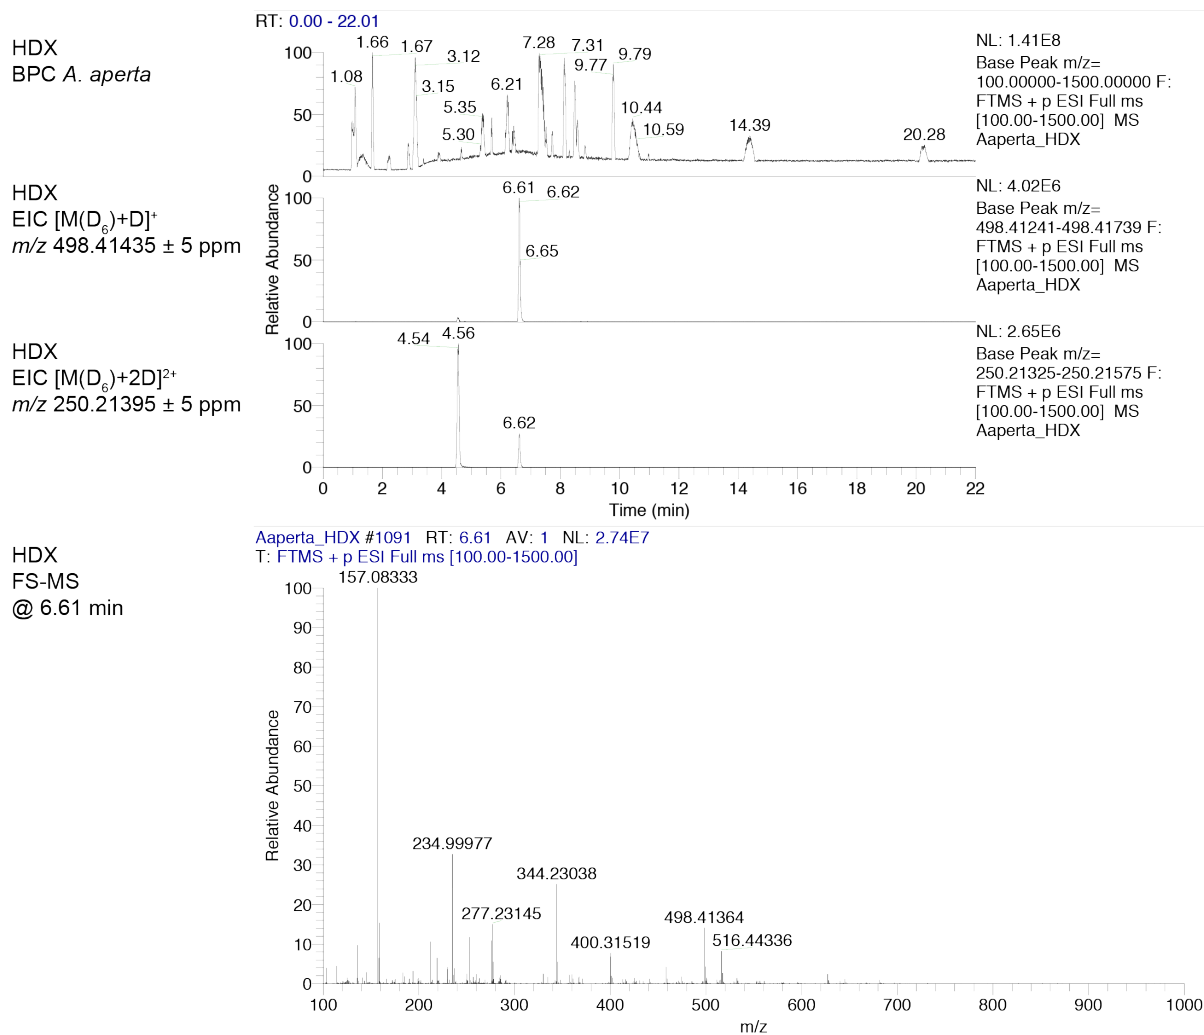

## FS-MS / FS-MS HDX

|                                     | <i>m/z</i> detected | <i>R</i> <sub>t</sub> [min] | <i>m/z</i> FRIOC | Molecular formula                                                                         | Δ [ppm] |
|-------------------------------------|---------------------|-----------------------------|------------------|-------------------------------------------------------------------------------------------|---------|
| [M+H] <sup>+</sup>                  | 491.37039           | 8.32                        | 491.37042        | C <sub>26</sub> H <sub>47</sub> N <sub>6</sub> O <sub>3</sub> <sup>+</sup>                | -0.06   |
| [M(D <sub>6</sub> )+D] <sup>+</sup> | 498.41364           | 6.61                        | 498.41435        | C <sub>26</sub> H <sub>40</sub> D <sub>7</sub> N <sub>6</sub> O <sub>3</sub> <sup>+</sup> | -1.42   |

**MS/MS ( $P^+ = m/z$  491.37)**

| $m/z$ detected | Rel. Int. | $m/z$ FRIOC | Molecular formula      | $\Delta$ [ppm] | Fragment type       |
|----------------|-----------|-------------|------------------------|----------------|---------------------|
| 58.06600       | 1.78      | –           |                        |                |                     |
| 70.06584       | 4.91      | –           |                        |                |                     |
| 84.08144       | 4.66      | –           |                        |                |                     |
| 86.09706       | 0.89      | –           |                        |                |                     |
| 98.09695       | 37.91     | –           | $C_6H_{12}N^+$         | 5.30           | $y_2'^*$            |
| 112.11271      | 1.31      | –           |                        |                |                     |
| 113.10795      | 1.12      | –           |                        |                |                     |
| 114.09179      | 2.65      | –           |                        |                |                     |
| 114.12819      | 100.00    | 114.12773   | $C_7H_{16}N^+$         | 4.03           | $z_1$               |
| 126.12802      | 49.78     | –           | $C_8H_{16}N^+$         | 2.30           | $z_2 - NHMe_2^*$    |
| 131.11825      | 3.30      | –           |                        |                |                     |
| 143.15428      | 0.65      | –           |                        |                |                     |
| 146.06014      | 8.73      | –           | $C_9H_8NO^+$           | 0.68           | $a'^*$              |
| 171.18599      | 5.02      | –           |                        |                |                     |
| 183.18580      | 6.61      | –           | $C_{11}H_{23}N_2^+$    | 1.20           | $z_3 - NHMe_2^*$    |
| 228.24420      | 4.76      | –           |                        |                |                     |
| 231.11307      | 42.42     | 231.11280   | $C_{13}H_{15}N_2O_2^+$ | 1.17           | $a_1$               |
| 231.13557      | 0.62      | –           |                        |                |                     |
| 261.26518      | 0.54      | –           |                        |                |                     |
| 273.26583      | 1.55      | –           | $C_{14}H_{33}N_4O^+$   | 3.44           | $t_{z4} - NHMe_2^*$ |
| 304.16583      | 4.64      | 304.16557   | $C_{16}H_{22}N_3O_3^+$ | 0.85           | $a_2$               |
| 318.32306      | 6.61      | –           |                        |                |                     |
| 321.19306      | 1.50      | –           |                        |                |                     |
| 361.22346      | 13.13     | 361.22342   | $C_{19}H_{29}N_4O_3^+$ | 0.11           | $a_3$               |
| 446.31320      | 13.94     | 446.31257   | $C_{24}H_{40}N_5O_3^+$ | 1.41           | $a_4$               |
| 491.37023      | 68.84     | 491.37042   | $C_{26}H_{47}N_6O_3^+$ | -0.39          | $[M+H]^+$           |

\* this fragment ion is not generated by FRIOC
